# Supplementary material for: The Connection of Azole Fungicides with Xeno-Sensing Nuclear Receptors, Drug Metabolism and Hepatotoxicity
Source: Cells. 2020 May 11;9(5):1192. doi: 10.3390/cells9051192 (PMC7290820; doi:10.3390/cells9051192)
Supplement: Supplementary file 1 [file cells-09-01192-s001.xlsx]

## Sheet: DataTable_complete
Author	Journal	Year	Compound	NR	Method	Organism	In vivo/vitro	System	Direction of regulation
Ghisari	TAAP	2015	bitertanol	AHR	reporter assay	mouse	in vitro	Hepa1.12cR	inhibition; basal and TCDD-induced
Abdelhadya	Toxicol Mech Methods	2017	bromuconazole	CAR	mRNA Cyp2b1, CAR	rat	in vivo	liver tissue	inhibition (CAR mRNA, CYP2B1 mRNA)
Abdelhadya	Toxicol Mech Methods	2017	bromuconazole	PXR	mRNA Cyp3a1, PXR	rat	in vivo	liver tissue	induction (PXR mRNA, CYP3A1 mRNA)
Abdelhadya	Toxicol Mech Methods	2017	bromuconazole	CAR	activity PROD	rat	in vivo	liver tissue	unchanged
Abdelhadya	Toxicol Mech Methods	2017	bromuconazole	PXR	activity BROD	rat	in vivo	liver tissue	induction
Hester	Tox Sci	2012	cyproconazole	CAR	mRNA Cyp2b10	mouse	in vivo	liver tissue	induction
Peffer	Tox Sci	2007	cyproconazole	CAR	mRNA Cyp2b10	mouse	in vivo	liver tissue	induction; abolished in CAR-KO
Peffer	Tox Sci	2007	cyproconazole	CAR	protein Cyp2b10 WB	mouse	in vivo	liver tissue	induction; abolished in CAR-KO
Peffer	Tox Sci	2007	cyproconazole	CAR	activity BROD	mouse	in vivo	liver tissue	induction; abolished in CAR-KO
Peffer	Tox Sci	2007	cyproconazole	PXR	activity coumarin hydroxylase	mouse	in vivo	liver tissue	induction; WT > CAR-KO
Oshida	Nuclear Receptor Signaling	2015	cyproconazole	CAR	mRNA CAR gene signature	mouse	in vivo	liver tissue	activation predicted; transcriptomic data from Hester et al. 2012
Tamura	Food Chem Tox	2015	cyproconazole	CAR	mRNA Cyp2b10	mouse	in vivo	liver tissue	induction; diminished in CAR-KO
Tamura	Food Chem Tox	2015	cyproconazole	AHR	mRNA Cyp1a2	mouse	in vivo	liver tissue	induction; diminished in CAR-KO
Tamura	Food Chem Tox	2015	cyproconazole	PXR	mRNA Cyp3a11	mouse	in vivo	liver tissue	induction; diminished in CAR-KO
Tamura	Food Chem Tox	2015	cyproconazole	CAR	protein Cyp2b (IHC)	mouse	in vivo	liver tissue	induction perivenous; diminished in CAR-KO
Tamura	Tox Lett	2013	cyproconazole	CAR	protein Cyp2b (IHC)	mouse	in vivo	liver tissue	induction perivenous; diminished in CAR-KO
Tamura	Tox Lett	2013	cyproconazole	CAR	mRNA Cyp2b10	mouse	in vivo	liver tissue	induction; diminished in CAR-KO
Tamura	Tox Lett	2013	cyproconazole	AHR	mRNA Cyp1a2	mouse	in vivo	liver tissue	induction; diminished in CAR-KO
Tamura	Tox Lett	2013	cyproconazole	PXR	mRNA Cyp3a11	mouse	in vivo	liver tissue	induction; diminished in CAR-KO
Heise	ATOX	2015	cyproconazole	CAR	mRNA Cyp2b1	rat	in vivo	liver tissue	induction
Heise	ATOX	2018	cyproconazole	CAR	mRNA Cyp2b1, Cyp2b2	rat	in vivo	liver tissue	induction
Rieke	IJERPH	2014	cyproconazole	AHR	mRNA CYP1A1	human	in vitro	Jeg-3	unchanged
Rieke	IJERPH	2014	cyproconazole	AHR	reporter assay XRE	human	in vitro	Jeg-3	unchanged
Heise	ATOX	2015	cyproconazole	AHR	mRNA Cyp1a1	rat	in vivo	liver tissue	induction (weak)
Heise	ATOX	2018	cyproconazole	AHR	mRNA Cyp1a1, Cyp1a2	rat	in vivo	liver tissue	induction (weak) only Cyp1a1
Marx-Stoelting	ATOX	2017	cyproconazole	AHR	protein CYP1A (IHC)	mouse	in vivo	liver tissue	induction perivenous; WT > hCAR/hPXR
Marx-Stoelting	ATOX	2017	cyproconazole	CAR	protein CYP2B (IHC)	mouse	in vivo	liver tissue	induction perivenous; WT > hCAR/hPXR
Marx-Stoelting	ATOX	2017	cyproconazole	CAR	mRNA Cyp2b10	mouse	in vivo	liver tissue	induction; WT > hCAR/hPXR
Marx-Stoelting	ATOX	2017	cyproconazole	CAR	protein Cyp2b10 (MS)	mouse	in vivo	liver tissue	induction; WT > hCAR/hPXR
Marx-Stoelting	ATOX	2017	cyproconazole	CAR	reporter assay hCYP2B6	human	in vitro	HC-AFW1	unchanged
Marx-Stoelting	ATOX	2017	cyproconazole	AHR	reporter assay hXRE	human	in vitro	HC-AFW1	unchanged
Marx-Stoelting	ATOX	2017	cyproconazole	AHR	mRNA Ahr	mouse	in vivo	liver tissue	induction
Marx-Stoelting	ATOX	2017	cyproconazole	AHR	mRNA Cyp1a1	mouse	in vivo	liver tissue	unchanged
Heise	ATOX	2015	cyproconazole	PXR	mRNA Cyp3a1	rat	in vivo	liver tissue	induction
Heise	ATOX	2018	cyproconazole	PXR	mRNA Cyp3a1, Cyp3a2	rat	in vivo	liver tissue	induction
Heise	ATOX	2015	cyproconazole	CAR	activity PROD	rat	in vivo	liver tissue	induction
Heise	ATOX	2015	cyproconazole	AHR	activity EROD	rat	in vivo	liver tissue	unchanged
Heise	ATOX	2015	cyproconazole	PXR	activity BROD	rat	in vivo	liver tissue	induction
Heise	ATOX	2018	cyproconazole	CAR	activity PROD	rat	in vivo	liver tissue	induction
Heise	ATOX	2018	cyproconazole	AHR	activity EROD	rat	in vivo	liver tissue	unchanged
Heise	ATOX	2018	cyproconazole	PXR	activity BROD	rat	in vivo	liver tissue	induction
Luckert	Chem Res Tox	2018	cyproconazole	AHR	reporter assay XRE	human	in vitro	HepG2	unchanged
Luckert	Chem Res Tox	2018	cyproconazole	CAR	reporter assay CAR-TA	human	in vitro	HEK293	unchanged
Luckert	Chem Res Tox	2018	cyproconazole	PXR	reporter assay PXR-TA	human	in vitro	HEK293	induction
Luckert	Chem Res Tox	2018	cyproconazole	AHR	mRNA CYP1A2	human	in vitro	HepaRG	induction
Luckert	Chem Res Tox	2018	cyproconazole	CAR	mRNA CYP2B6	human	in vitro	HepaRG	induction
Luckert	Chem Res Tox	2018	cyproconazole	PXR	mRNA CYP3A4	human	in vitro	HepaRG	induction
Luckert	Chem Res Tox	2018	cyproconazole	PXR	protein CYP3A4 (MS)	human	in vitro	HepaRG	induction
Seeger	ATOX	2019	cyproconazole	AHR	mRNA Cyp1a1	rat	in vitro	H4IIE	induction (weak)
Seeger	ATOX	2019	cyproconazole	AHR	mRNA CYP1A1	human	in vitro	HepaRG	induction (weak)
Seeger	ATOX	2019	cyproconazole	CAR	reporter assay CAR-TA	human	in vitro	HepG2	induction (weak)
Oshida	Nuclear Receptor Signaling	2015	epoxiconazole	CAR	mRNA CAR gene signature	mouse	in vivo	liver tissue	activation predicted; transcriptomic data from Hester et al. 2012
Heise	ATOX	2015	epoxiconazole	CAR	mRNA Cyp2b1	rat	in vivo	liver tissue	induction
Heise	ATOX	2018	epoxiconazole	CAR	mRNA Cyp2b1, Cyp2b2	rat	in vivo	liver tissue	induction
Rieke	IJERPH	2014	epoxiconazole	AHR	mRNA CYP1A1	human	in vitro	Jeg-3	induction; abolished by AhR inhibitor
Rieke	IJERPH	2014	epoxiconazole	AHR	reporter assay XRE	human	in vitro	Jeg-3	unchanged
Heise	ATOX	2015	epoxiconazole	AHR	mRNA Cyp1a1	rat	in vivo	liver tissue	induction (weak)
Heise	ATOX	2018	epoxiconazole	AHR	mRNA Cyp1a1, Cyp1a2	rat	in vivo	liver tissue	induction (weak) only Cyp1a1
Heise	ATOX	2015	epoxiconazole	PXR	mRNA Cyp3a1	rat	in vivo	liver tissue	induction
Heise	ATOX	2018	epoxiconazole	PXR	mRNA Cyp3a1, Cyp3a2	rat	in vivo	liver tissue	induction
Heise	ATOX	2015	epoxiconazole	CAR	activity PROD	rat	in vivo	liver tissue	induction
Heise	ATOX	2015	epoxiconazole	AHR	activity EROD	rat	in vivo	liver tissue	induction (weak)
Heise	ATOX	2015	epoxiconazole	PXR	activity BROD	rat	in vivo	liver tissue	induction
Heise	ATOX	2018	epoxiconazole	CAR	activity PROD	rat	in vivo	liver tissue	induction
Heise	ATOX	2018	epoxiconazole	AHR	activity EROD	rat	in vivo	liver tissue	induction (weak)
Heise	ATOX	2018	epoxiconazole	PXR	activity BROD	rat	in vivo	liver tissue	induction
Hester	Tox Sci	2012	epoxiconazole	CAR	mRNA Cyp2b10	mouse	in vivo	liver tissue	induction
Braeuning	ExCliJ	2020	epoxiconazole	AHR	mRNA CYP1A1	human	in vitro	HepaRG	induction
Braeuning	ExCliJ	2020	epoxiconazole	AHR	protein CYP1A1 (MS)	human	in vitro	HepaRG	induction
Seeger	ATOX	2019	epoxiconazole	AHR	mRNA Cyp1a1	rat	in vitro	H4IIE	induction
Seeger	ATOX	2019	epoxiconazole	AHR	mRNA CYP1A1	human	in vitro	HepaRG	induction
Seeger	ATOX	2019	epoxiconazole	AHR	reporter assay CAR-TA	human	in vitro	HepG2	induction
Omiecinski	Tox Sci	2011	etaconazole	CAR	reporter assay CYP2B1 PBREM	human	in vitro	COS-1, transfection of hCAR	unchanged CAR1 = WT; CAR3 variant weakly induced
Omiecinski	Tox Sci	2011	etaconazole	CAR	reporter assay CYP2B1 PBREM	rat	in vitro	COS-1, transfection of rCar	induction (weak) CAR1 = WT; CAR3 variant induced
Omiecinski	Tox Sci	2011	etaconazole	CAR	reporter assay CYP2B1 PBREM	dog	in vitro	COS-1, transfection of canine Car	induction (weak) CAR1 = WT; CAR3 variant unchanged
Omiecinski	Tox Sci	2011	etaconazole	CAR	reporter assay CYP2B1 PBREM	mouse	in vitro	COS-1, transfection of mCar	unchanged CAR1 = WT; CAR3 variant induced
Lemaire	Tox Sci	2006	fenbuconazole	PXR	reporter assay hPXR-TA	human	in vitro	HeLa stably transfected	induction
Nagai	DMD	2016	fenbuconazole	AHR	mRNA CYP1A2	human	in vitro	primary hepatocytes	induction
Nagai	DMD	2016	fenbuconazole	CAR	mRNA CYP2B6	human	in vitro	primary hepatocytes	induction
Nagai	DMD	2016	fenbuconazole	PXR	mRNA CYP3A4	human	in vitro	primary hepatocytes	induction
Rieke	IJERPH	2014	flusilazole	AHR	mRNA CYP1A1	human	in vitro	Jeg-3	induction; abolished by AhR inhibitor
Rieke	IJERPH	2014	flusilazole	AHR	reporter assay XRE	human	in vitro	Jeg-3	unchanged
Braeuning	ExCliJ	2020	flusilazole	AHR	mRNA CYP1A1	human	in vitro	HepaRG	induction
Tamura	J Tox Sci	2016	imazalil	CAR	protein Cyp2b (IHC)	mouse	in vivo	liver tissue	induction perivenous; diminished in CAR-KO
Tamura	J Tox Sci	2016	imazalil	CAR	mRNA Cyp2b10	mouse	in vivo	liver tissue	induction; diminished in CAR-KO
Tamura	J Tox Sci	2016	imazalil	AHR	mRNA Cyp1a2	mouse	in vivo	liver tissue	induction; diminished in CAR-KO
Tamura	J Tox Sci	2016	imazalil	PXR	mRNA Cyp3a11	mouse	in vivo	liver tissue	induction
Sergent	Tox Lett	2009	imazalil	AHR	activity EROD	human	in vitro	Caco-2	induction
Sergent	Tox Lett	2009	imazalil	AHR	mRNA CYP1A1	human	in vitro	Caco-2	unchanged (possibly weak induction?)
Sergent	Tox Lett	2009	imazalil	PXR	activity testosterone hydroxylation	human	in vitro	Caco-2	inhibition
Lemaire	Tox Sci	2006	imazalil	PXR	reporter assay hPXR-TA	human	in vitro	HeLa stably transfected	induction
Nagai	DMD	2016	imazalil	AHR	mRNA CYP1A2	human	in vitro	primary hepatocytes	induction
Nagai	DMD	2016	imazalil	CAR	mRNA CYP2B6	human	in vitro	primary hepatocytes	induction
Nagai	DMD	2016	imazalil	PXR	mRNA CYP3A4	human	in vitro	primary hepatocytes	induction
Braeuning	ExCliJ	2020	imazalil	AHR	mRNA CYP1A1	human	in vitro	HepaRG	induction
Braeuning	ExCliJ	2020	imazalil	AHR	protein CYP1A1 (MS)	human	in vitro	HepaRG	induction
Yoshimaru	J Tox Sci	2018	imazalil	PXR	reporter assay	mouse	in vitro	HepG2 transfected with mPXR	induction
Yoshimaru	J Tox Sci	2018	imazalil	PXR	mRNA Cyp3a11	mouse	in vivo	liver tissue	induction
Yoshimaru	J Tox Sci	2018	imazalil	CAR	mRNA Cyp2b10	mouse	in vivo	liver tissue	induction
Lichtenstein	Food Chem Tox	2020	imazalil	PXR	reporter assay	human	in vitro	HepG2	induction
Lichtenstein	Food Chem Tox	2020	imazalil	CAR	reporter assay	human	in vitro	HepG2	induction
Lichtenstein	Food Chem Tox	2020	imazalil	AHR	reporter assay	human	in vitro	HepG2	unchanged
Lichtenstein	Food Chem Tox	2020	imazalil	AHR	mRNA CYP1A2	human	in vitro	HepaRG	induction
Lichtenstein	Food Chem Tox	2020	imazalil	CAR	mRNA CYP2B6	human	in vitro	HepaRG	induction
Lichtenstein	Food Chem Tox	2020	imazalil	PXR	mRNA CYP3A4	human	in vitro	HepaRG	induction
Lichtenstein	Food Chem Tox	2020	imazalil	CAR	protein CYP2B6 (MS)	human	in vitro	HepaRG	induction (weak)
Lichtenstein	Food Chem Tox	2020	imazalil	PXR	protein CYP3A4 (MS)	human	in vitro	HepaRG	induction
Oshida	Nuclear Receptor Signaling	2015	myclobutanil	CAR	mRNA CAR gene signature	mouse	in vivo	liver tissue	activation predicted; transcriptomic data from Ward et al. 2006
Goetz	Tox Sci	2009	myclobutanil	CAR	mRNA Cyp2b1/2	rat	in vivo	liver tissue	induction
Goetz	Tox Sci	2009	myclobutanil	PXR	mRNA Cyp3a1, Cyp3a2	rat	in vivo	liver tissue	induction
Goetz	Tox Sci	2009	myclobutanil	AHR	mRNA Cyp1a1	rat	in vivo	liver tissue	unchanged
Nagai	DMD	2016	myclobutanil	AHR	mRNA CYP1A2	human	in vitro	primary hepatocytes	induction (weak)
Nagai	DMD	2016	myclobutanil	CAR	mRNA CYP2B6	human	in vitro	primary hepatocytes	induction
Nagai	DMD	2016	myclobutanil	PXR	mRNA CYP3A4	human	in vitro	primary hepatocytes	induction
Braeuning	ExCliJ	2020	myclobutanil	AHR	mRNA CYP1A1	human	in vitro	HepaRG	induction
Braeuning	ExCliJ	2020	myclobutanil	AHR	protein CYP1A1 (MS)	human	in vitro	HepaRG	induction
Lin	J Haz Mat	2014	myclobutanil	AHR	activity EROD	medaka fish	in vivo	liver tissue	induction
Lin	J Haz Mat	2014	myclobutanil	AHR	mRNA Cyp1a	medaka fish	in vivo	liver tissue	inhibition
Lin	J Haz Mat	2014	myclobutanil	PXR	activity dibenzylfluorescein dealkylation	medaka fish	in vivo	liver tissue	unchanged
Lin	J Haz Mat	2014	myclobutanil	AHR	reporter assay	human	in vivo	yeast, stably transfected	induction
Nagai	DMD	2016	hexaconazole	AHR	mRNA CYP1A2	human	in vitro	primary hepatocytes	induction
Nagai	DMD	2016	hexaconazole	CAR	mRNA CYP2B6	human	in vitro	primary hepatocytes	induction
Nagai	DMD	2016	hexaconazole	PXR	mRNA CYP3A4	human	in vitro	primary hepatocytes	induction
Knebel	Tox Sci	2018	tebuconazole	CAR	molecular docking	human	in silico	cell-free	weak binding predicted
Knebel	Tox Sci	2018	tebuconazole	CAR	FRET assay	human	in vitro	cell-free	weak binding
Knebel	Tox Sci	2018	tebuconazole	CAR	reporter assay CAR-TA, hCYP2B6	human	in vitro	HepG2	inhibition; basal and CITCO-induced
Knebel	Tox Sci	2018	tebuconazole	PXR	reporter assay hCYP2B6, hCYP3A4, PXR-TA	human	in vitro	HepG2 (incl. stably transfected)	induction; hCYP2B6 reporter in PXR-expressing, CAR-deficient HepG2 clone to show PXR dependency
Knebel	Tox Sci	2018	tebuconazole	PXR	mRNA CYP3A4	human	in vitro	HepaRG	induction
Knebel	Tox Sci	2018	tebuconazole	CAR	reporter assay rCYP2B1	rat	in vitro	primary hepatocytes	induction (weak); PBREM-dependency shown by mutation
Knebel	Tox Sci	2018	tebuconazole	CAR	mRNA CYP2B6	human	in vitro	HepaRG	induction
Knebel	Tox Sci	2018	tebuconazole	CAR	mRNA Cyp2b1	rat	in vitro	primary hepatocytes	induction
Knebel	Tox Sci	2018	tebuconazole	CAR	activity buproprion hydroxylation MS	human	in vitro	HepaRG	induction
Knebel	Tox Sci	2018	tebuconazole	PXR	activity midazolam hydroxylation MS	human	in vitro	HepaRG	induction
Rieke	IJERPH	2014	tebuconazole	AHR	mRNA CYP1A1	human	in vitro	Jeg-3	induction; abolished by AhR inhibitor
Rieke	IJERPH	2014	tebuconazole	AHR	reporter assay XRE	human	in vitro	Jeg-3	unchanged
Knebel	Food Chem Tox	2019	tebuconazole	AHR	mRNA Cyp1a1, Cyp1a2	rat	in vivo	liver tissue	induction
Knebel	Food Chem Tox	2019	tebuconazole	AHR	activity EROD, MROD	rat	in vivo	liver tissue	induction; only EROD
Knebel	Food Chem Tox	2019	tebuconazole	AHR	mRNA CYP1A1	human	in vitro	HepG2	induction
Knebel	Food Chem Tox	2019	tebuconazole	AHR	reporter assay XRE, hCYP1A1	human	in vitro	HepG2	unchanged
Knebel	Food Chem Tox	2019	tebuconazole	AHR	mRNA CYP1A1, CYP1A2	human	in vitro	HepaRG	induction; abolished by AhR inhibitor and in AHR-KO cell clone
Knebel	Food Chem Tox	2019	tebuconazole	CAR	mRNA CYP2B6	human	in vitro	HepaRG	induction
Knebel	Food Chem Tox	2019	tebuconazole	PXR	mRNA CYP3A4	human	in vitro	HepaRG	induction
Knebel	Food Chem Tox	2019	tebuconazole	AHR	activity phenacetin hydroxylation	human	in vitro	HepaRG	induction
Sergent	Tox Lett	2009	tebuconazole	AHR	activity EROD	human	in vitro	Caco-2	induction
Sergent	Tox Lett	2009	tebuconazole	PXR	activity testosterone hydroxylation	human	in vitro	Caco-2	unchanged
Nagai	DMD	2016	tebuconazole	AHR	mRNA CYP1A2	human	in vitro	primary hepatocytes	induction
Nagai	DMD	2016	tebuconazole	CAR	mRNA CYP2B6	human	in vitro	primary hepatocytes	induction
Nagai	DMD	2016	tebuconazole	PXR	mRNA CYP3A4	human	in vitro	primary hepatocytes	induction
Tamura	Food Chem Tox	2015	tebuconazole	CAR	mRNA Cyp2b10	mouse	in vivo	liver tissue	induction
Tamura	Food Chem Tox	2015	tebuconazole	AHR	mRNA Cyp1a2	mouse	in vivo	liver tissue	induction; diminished in CAR-KO
Tamura	Food Chem Tox	2015	tebuconazole	PXR	mRNA Cyp3a11	mouse	in vivo	liver tissue	induction
Tamura	Food Chem Tox	2015	tebuconazole	CAR	protein Cyp2b (IHC)	mouse	in vivo	liver tissue	induction perivenous
Tamura	Tox Lett	2013	tebuconazole	CAR	protein Cyp2b (IHC)	mouse	in vivo	liver tissue	induction perivenous
Knebel	ATOX	2019	tebuconazole	AHR	reporter assay XRE	human	in vitro	HepG2	unchanged
Knebel	ATOX	2019	tebuconazole	CAR	reporter assay CAR-TA	human	in vitro	HepG2	inhibition
Knebel	ATOX	2019	tebuconazole	PXR	reporter assay PXR-TA	human	in vitro	HepG2	induction
Braeuning	ExCliJ	2020	tebuconazole	AHR	mRNA CYP1A1	human	in vitro	HepaRG	induction
Braeuning	ExCliJ	2020	tebuconazole	AHR	protein CYP1A1 (MS)	human	in vitro	HepaRG	induction
Oshida	Nuclear Receptor Signaling	2015	triadimefon	CAR	mRNA Cyp2b10	mouse	in vivo	liver tissue	induction; abolished in CAR-KO
Tully	TAAP	2006	triadimefon	PXR	mRNA Cyp3a3	rat	in vivo	liver tissue	induction
Goetz	Tox Sci	2009	triadimefon	CAR	mRNA Cyp2b1/2	rat	in vivo	liver tissue	induction
Goetz	Tox Sci	2009	triadimefon	AHR	mRNA Cyp1a1	rat	in vivo	liver tissue	induction
Goetz	Tox Sci	2009	triadimefon	PXR	mRNA Cyp3a1, Cyp3a2	rat	in vivo	liver tissue	induction; only Cyp3a1
Oshida	Nuclear Receptor Signaling	2015	triadimefon	CAR	mRNA CAR gene signature	mouse	in vivo	liver tissue	activation predicted; transcriptomic data from Ward et al. 2006
Nesnow	Tox Sci	2009	triadimefon	CAR	toxicogenomics data mining	mouse	in vivo	liver tissue	induction
Nesnow	Tox Sci	2009	triadimefon	PXR	toxicogenomics data mining	mouse	in vivo	liver tissue	induction
Nesnow	Tox Sci	2009	triadimefon	AHR	toxicogenomics data mining	mouse	in vivo	liver tissue	induction
Lin	J Haz Mat	2014	triadimefon	AHR	activity EROD	medaka fish	in vivo	liver tissue	induction
Lin	J Haz Mat	2014	triadimefon	AHR	reporter assay	human	in vivo	yeast, stably transfected	induction
Lin	J Haz Mat	2014	triadimefon	AHR	mRNA Cyp1a	medaka fish	in vivo	liver tissue	induction
Lin	J Haz Mat	2014	triadimefon	PXR	activity dibenzylfluorescein dealkylation	medaka fish	in vivo	liver tissue	induction
Heise	ATOX	2015	prochloraz	CAR	mRNA Cyp2b1	rat	in vivo	liver tissue	induction
Heise	ATOX	2018	prochloraz	CAR	mRNA Cyp2b1, Cyp2b2	rat	in vivo	liver tissue	induction
Rieke	IJERPH	2014	prochloraz	AHR	mRNA CYP1A1	human	in vitro	Jeg-3	induction; abolished by AhR inhibitor
Rieke	IJERPH	2014	prochloraz	AHR	reporter assay XRE	human	in vitro	Jeg-3	induction
Heise	ATOX	2015	prochloraz	AHR	mRNA Cyp1a1	rat	in vivo	liver tissue	induction
Heise	ATOX	2018	prochloraz	AHR	mRNA Cyp1a1, Cyp1a2	rat	in vivo	liver tissue	induction; only Cyp1a1
Lemaire	Tox Sci	2006	prochloraz	PXR	reporter assay hPXR-TA	human	in vitro	HeLa stably transfected	induction
Heise	ATOX	2015	prochloraz	PXR	mRNA Cyp3a1	rat	in vivo	liver tissue	unchanged
Heise	ATOX	2018	prochloraz	PXR	mRNA Cyp3a1, Cyp3a2	rat	in vivo	liver tissue	induction; only Cyp3a2
Heise	ATOX	2015	prochloraz	CAR	activity PROD	rat	in vivo	liver tissue	induction
Heise	ATOX	2015	prochloraz	AHR	activity EROD	rat	in vivo	liver tissue	induction
Heise	ATOX	2015	prochloraz	PXR	activity BROD	rat	in vivo	liver tissue	induction (weak)
Heise	ATOX	2018	prochloraz	CAR	activity PROD	rat	in vivo	liver tissue	induction
Heise	ATOX	2018	prochloraz	AHR	activity EROD	rat	in vivo	liver tissue	induction
Heise	ATOX	2018	prochloraz	PXR	activity BROD	rat	in vivo	liver tissue	induction (weak)
Marx-Stoelting	ATOX	2017	prochloraz	AHR	protein CYP1A (IHC)	mouse	in vivo	liver tissue	induction perivenous; WT > hCAR/hPXR
Marx-Stoelting	ATOX	2017	prochloraz	CAR	protein CYP2B (IHC)	mouse	in vivo	liver tissue	induction perivenous; WT > hCAR/hPXR
Marx-Stoelting	ATOX	2017	prochloraz	CAR	mRNA Cyp2b10	mouse	in vivo	liver tissue	induction; only WT, not hCAR/hPXR
Marx-Stoelting	ATOX	2017	prochloraz	CAR	protein Cyp2b10 (MS)	mouse	in vivo	liver tissue	induction; only WT, not hCAR/hPXR
Marx-Stoelting	ATOX	2017	prochloraz	CAR	reporter assay hCYP2B6	human	in vitro	HC-AFW1	induction
Marx-Stoelting	ATOX	2017	prochloraz	AHR	reporter assay XRE	human	in vitro	HC-AFW1	induction
Marx-Stoelting	ATOX	2017	prochloraz	AHR	mRNA Ahr	mouse	in vivo	liver tissue	unchanged
Marx-Stoelting	ATOX	2017	prochloraz	AHR	mRNA Cyp1a1	mouse	in vivo	liver tissue	induction; WT = hCAR/hPXR
Braeuning	ExCliJ	2020	prochloraz	AHR	mRNA CYP1A1	human	in vitro	HepaRG	induction
Knebel	Tox Sci	2018	propiconazole	CAR	molecular docking	human	in silico	cell-free	weak binding predicted
Knebel	Tox Sci	2018	propiconazole	CAR	FRET assay	human	in vitro	cell-free	weak binding
Knebel	Tox Sci	2018	propiconazole	CAR	reporter assay CAR-TA, hCYP2B6	human	in vitro	HepG2	induction
Knebel	Tox Sci	2018	propiconazole	PXR	reporter assay hCYP2B6, hCYP3A4, PXR-TA	human	in vitro	HepG2 stably transfected	induction; hCYP2B6 reporter in PXR-expressing, CAR-deficient HepG2 clone to show PXR-dependency
Knebel	Tox Sci	2018	propiconazole	PXR	mRNA CYP3A4	human	in vitro	HepaRG	induction
Knebel	Tox Sci	2018	propiconazole	CAR	reporter assay rCYP2B1	rat	in vitro	primary hepatocytes	induction; PBREM-dependency shown by mutation
Knebel	Tox Sci	2018	propiconazole	CAR	mRNA CYP2B6	human	in vitro	HepaRG	induction
Knebel	Tox Sci	2018	propiconazole	CAR	mRNA Cyp2b1	rat	in vitro	primary hepatocytes	induction
Knebel	Tox Sci	2018	propiconazole	CAR	activity buproprion hydroxylation MS	human	in vitro	HepaRG	inhibition (probably direct enzyme inhibition)
Knebel	Tox Sci	2018	propiconazole	PXR	activity midazolam hydroxylation MS	human	in vitro	HepaRG	inhibition (probably direct enzyme inhibition)
Currie	Toxicol	2014	propiconazole	CAR	reporter assay hCAR3	human	in vitro	COS-1, transfection of hCAR	induction (weak)
Currie	Toxicol	2014	propiconazole	CAR	reporter assay mCAR3	mouse	in vitro	COS-1, transfection of mCar	induction
Currie	Toxicol	2014	propiconazole	PXR	toxicogenomics data mining	mouse	in vivo	liver tissue	activation predicted
Currie	Toxicol	2014	propiconazole	CAR	toxicogenomics data mining	mouse	in vivo	liver tissue	activation predicted
Oshida	Nuclear Receptor Signaling	2015	propiconazole	CAR	mRNA Cyp2b10	mouse	in vivo	liver tissue	induction; abolished in CAR-KO
Tully	TAAP	2006	propiconazole	AHR	mRNA Cyp1a2	rat	in vivo	liver tissue	induction
Tully	TAAP	2006	propiconazole	PXR	mRNA Cyp3a3	rat	in vivo	liver tissue	induction
Goetz	Tox Sci	2009	propiconazole	CAR	mRNA Cyp2b1/2	rat	in vivo	liver tissue	induction
Sun	Tox Lett	2005	propiconazole	AHR	mRNA Cyp1a2	rat	in vivo	liver tissue	induction
Sun	Tox Lett	2005	propiconazole	CAR	mRNA Cyp2b1	rat	in vivo	liver tissue	induction
Sun	Tox Lett	2005	propiconazole	PXR	mRNA Cyp3a1, Cyp3a2	rat	in vivo	liver tissue	induction
Sun	Tox Lett	2005	propiconazole	AHR	mRNA Cyp1a2	mouse	in vivo	liver tissue	unchanged
Sun	Tox Lett	2005	propiconazole	CAR	mRNA Cyp2b10	mouse	in vivo	liver tissue	induction
Sun	Tox Lett	2005	propiconazole	PXR	mRNA Cyp3a11	mouse	in vivo	liver tissue	induction
Sun	Tox Lett	2005	propiconazole	AHR	activity EROD, MROD	rat	in vivo	liver tissue	induction
Sun	Tox Lett	2005	propiconazole	AHR	activity EROD, MROD	mouse	in vivo	liver tissue	induction; only MROD
Sun	Tox Lett	2005	propiconazole	CAR	activity PROD	rat	in vivo	liver tissue	induction
Sun	Tox Lett	2005	propiconazole	CAR	activity PROD	mouse	in vivo	liver tissue	induction
Knebel	ATOX	2019	propiconazole	AHR	reporter assay XRE	human	in vitro	HepG2	induction
Knebel	ATOX	2019	propiconazole	CAR	reporter assay CAR-TA	human	in vitro	HepG2	induction
Knebel	ATOX	2019	propiconazole	PXR	reporter assay PXR-TA	human	in vitro	HepG2	induction
Ghisari	TAAP	2015	propiconazole	AHR	reporter assay	mouse	in vitro	Hepa1.12cR	induction; antagonism of TCDD-induced induction
Li	Environ Tox	2013	propiconazole	AHR	activity EROD	rainbow trout	in vivo	liver tissue	induction
Goetz	Tox Sci	2009	propiconazole	AHR	mRNA Cyp1a1	rat	in vivo	liver tissue	induction
Sergent	Tox Lett	2009	propiconazole	AHR	activity EROD	human	in vitro	Caco-2	induction (weak)
Sergent	Tox Lett	2009	propiconazole	PXR	activity testosterone hydroxylation	human	in vitro	Caco-2	inhibition (weak)
Knebel	Food Chem Tox	2019	propiconazole	AHR	activity phenacetin hydroxylation	human	in vitro	HepaRG	induction
Knebel	Food Chem Tox	2019	propiconazole	AHR	mRNA CYP1A1, CYP1A2	human	in vitro	HepaRG	induction
Lemaire	Tox Sci	2006	propiconazole	PXR	reporter assay hPXR-TA	human	in vitro	HeLa stably transfected	induction
Goetz	Tox Sci	2009	propiconazole	PXR	mRNA Cyp3a1, Cyp3a2	rat	in vivo	liver tissue	induction
Knebel	ATOX	2018	propiconazole	AHR	mRNA CYP1A1, CYP1A2	human	in vitro	HepaRG	induction; abolished in AHR-KO cell clone
Knebel	ATOX	2018	propiconazole	AHR	protein CYP1A1 (MS)	human	in vitro	HepaRG	induction
Knebel	ATOX	2018	propiconazole	AHR	activity EROD	human	in vitro	HepaRG	induction
Knebel	ATOX	2018	propiconazole	AHR	activity EROD, MROD	rat	in vivo	liver tissue	induction
Knebel	ATOX	2018	propiconazole	AHR	mRNA Cyp1a1, Cyp1a2	rat	in vivo	liver tissue	induction
Knebel	ATOX	2018	propiconazole	AHR	mRNA CYP1A1	human	in vitro	HepG2	induction
Knebel	ATOX	2018	propiconazole	CAR	mRNA CYP2B6	human	in vitro	HepaRG	induction
Knebel	ATOX	2018	propiconazole	PXR	mRNA CYP3A4	human	in vitro	HepaRG	induction
Knebel	ATOX	2018	propiconazole	AHR	molecular docking	human	in silico	cell-free	weak binding predicted
Knebel	ATOX	2018	propiconazole	AHR	reporter assay XRE, hCYP1A1	human	in vitro	HepG2	induction; XRE dependency shown by mutation and AhR inhibitor
Nagai	DMD	2016	propiconazole	AHR	mRNA CYP1A2	human	in vitro	primary hepatocytes	induction
Nagai	DMD	2016	propiconazole	CAR	mRNA CYP2B6	human	in vitro	primary hepatocytes	induction
Nagai	DMD	2016	propiconazole	PXR	mRNA CYP3A4	human	in vitro	primary hepatocytes	induction
Oshida	Nuclear Receptor Signaling	2015	propiconazole	CAR	mRNA CAR gene signature	mouse	in vivo	liver tissue	activation predicted; transcriptomic data from Ward et al. 2006
Hester	Tox Sci	2012	propiconazole	CAR	mRNA Cyp2b10	mouse	in vivo	liver tissue	induction
Ward	Tox Pathol	2006	propiconazole	CAR	mRNA Cyp2b20	mouse	in vivo	liver tissue	induction
Braeuning	ExCliJ	2020	propiconazole	AHR	protein CYP1A1 (MS)	human	in vitro	HepaRG	induction
Nesnow	Tox Sci	2009	propiconazole	CAR	toxicogenomics data mining	mouse	in vivo	liver tissue	induction
Nesnow	Tox Sci	2009	propiconazole	PXR	toxicogenomics data mining	mouse	in vivo	liver tissue	induction
Nesnow	Tox Sci	2009	propiconazole	AHR	toxicogenomics data mining	mouse	in vivo	liver tissue	induction
Lange	Tox in vitro	2009	propiconazole	PXR	reporter assay	human	in vitro	COS-7	induction
Lange	Tox in vitro	2009	propiconazole	PXR	reporter assay	common carp	in vitro	COS-7	induction
Lin	J Haz Mat	2014	propiconazole	AHR	reporter assay	human	in vitro	yeast, stably transfected	induction
Nagai	DMD	2016	triflumizole	AHR	mRNA CYP1A2	human	in vitro	primary hepatocytes	induction
Nagai	DMD	2016	triflumizole	CAR	mRNA CYP2B6	human	in vitro	primary hepatocytes	induction
Nagai	DMD	2016	triflumizole	PXR	mRNA CYP3A4	human	in vitro	primary hepatocytes	induction
Nagai	DMD	2016	uniconazole	AHR	mRNA CYP1A2	human	in vitro	primary hepatocytes	induction
Nagai	DMD	2016	uniconazole	CAR	mRNA CYP2B6	human	in vitro	primary hepatocytes	induction
Nagai	DMD	2016	uniconazole	PXR	mRNA CYP3A4	human	in vitro	primary hepatocytes	induction
Ghisari	TAAP	2015	prothioconazole	AHR	reporter assay	mouse	in vitro	Hepa1.12cR	inhibition; basal and TCDD-induced
Braeuning	ExCliJ	2020	difeconazole	AHR	mRNA CYP1A1	human	in vitro	HepaRG	induction
Yoshimaru	J Tox Sci	2018	thiabendazole	PXR	reporter assay	mouse	in vitro	HepG2 transfected with mPXR	induction
Lin	J Haz Mat	2014	triadimenol	AHR	reporter assay	human	in vivo	yeast, stably transfected	induction
